# Supplementary material for: Efficacy and safety of the human anti-IL-1beta monoclonal antibody canakinumab in rheumatoid arthritis: results of a 12-week, phase II, dose-finding study
Source: Springer Nature journal article supplement (doi:10.1186/1471-2474-12-153), 2011-07-07
Supplement: 12891_2010_1195_MOESM1_ESM.pdf [file 12891_2010_1195_MOESM1_ESM.pdf]

486 Subjects screened

209 Excluded

- 10 Unacceptable past medical history
  - 1 Unacceptable past medical history/unacceptable lab value/did not meet diagnostic criteria
  - 3 Unacceptable past medical history/unacceptable use of excluding medication
- 3 Intercurrent medical event
- 64 Unacceptable lab value
  - 11 Unacceptable lab value/did not meet diagnostic criteria
  - 1 Unacceptable lab value/other
- 6 Unacceptable test procedure
  - 1 Unacceptable test procedure/unacceptable use of excluding medication
- 47 Did not meet diagnostic criteria
  - 5 Unacceptable use of excluding medication
  - 1 Unacceptable use of excluding medication/other
- 19 Subject withdrew consent
- 36 Other reasons

277 Randomized

71 Placebo;  
1 did not receive placebo

69 Canakinumab  
150 mg SC q4wk

66 Canakinumab  
300 mg SC q2wk;  
2 did not receive canakinumab

71 Canakinumab  
600 mg IV + 300 mg  
SC q2wk

7 Discontinuations  
1 Adverse event  
4 Lack of effect  
2 Withdrew consent

4 Discontinuations  
1 Adverse event  
1 Administrative issue(s)  
2 Protocol deviations

8 Discontinuations  
3 Adverse events  
1 Laboratory value(s) outside normal  
3 Lack of effect  
1 Lost to follow-up

9 Discontinuations  
5 Adverse events  
1 Lack of effect  
1 Withdrew consent  
1 Lost to follow-up  
1 Administrative issue(s)

63 Completers

65 Completers

56 Completers

62 Completers
