# Supplementary material for: Efficacy and safety of the human anti-IL-1beta monoclonal antibody canakinumab in rheumatoid arthritis: results of a 12-week, phase II, dose-finding study
Source: Springer Nature journal article supplement (doi:10.1186/1471-2474-12-153), 2011-07-07
Supplement: 12891_2010_1195_MOESM3_ESM.pdf [file 12891_2010_1195_MOESM3_ESM.pdf]

**DAS28: Treatment Difference versus Placebo in Treatment Dosage Groups**

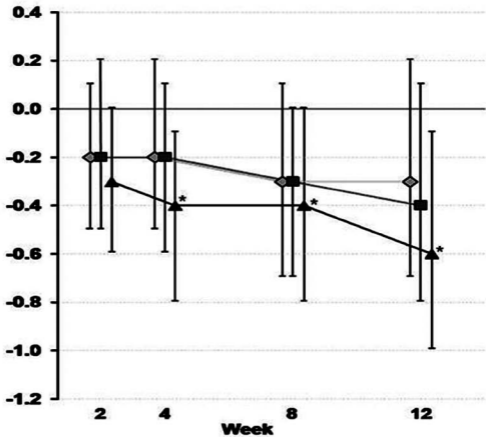

▲ 150 mg SC q2wk

■ 300 mg SC q2wk

◇ 600 mg IV + 300 mg SC q2wk
